# Supplementary material
Source: PubMed Central journal article supplement (PMC5142632)
Supplement: NIHMS832720-supplement-Supp_table.pdf [file NIHMS832720-supplement-Supp_table.pdf]

**Supplemental Table 1:** Sex-based data reporting, analysis, and discussion by specialty. From least to greatest, by sex-based reporting of data.

|                                        | Breast | Bariatric | Cardiac | SurgEd/<br>Training | Pediatric<br>Surgery | General<br>Surgery | Surgery-<br>Unspecified | Trauma/<br>Critical Care | Vascular | Transplant | Thoracic | Endocrine | Surgical<br>Oncology | Colorectal | <i>p</i> |
|----------------------------------------|--------|-----------|---------|---------------------|----------------------|--------------------|-------------------------|--------------------------|----------|------------|----------|-----------|----------------------|------------|----------|
| <b>Sex-Based Reporting Of Data</b>     | 5.4%   | 15.2%     | 17.7%   | 22.5%               | 32.2%                | 33.2%              | 33.3%                   | 33.9%                    | 35.7%    | 40.8%      | 46.1%    | 47.6%     | 49.6%                | 50.4%      | <0.0001  |
| <b>Sex Statistically Analyzed</b>      | 5.4%   | 15.2%     | 17.7%   | 19.4%               | 29.4%                | 29.8%              | 31.9%                   | 29.7%                    | 28.6%    | 26.5%      | 46.2%    | 42.1%     | 40.8%                | 48.2%      | <0.0001  |
| <b>Discussion of Sex-Based Results</b> | 1.8%   | 15.2%     | 11.8%   | 18.4%               | 23.5%                | 20.5%              | 22.2%                   | 19.5%                    | 21.4%    | 20.4%      | 28.2%    | 38.9%     | 25.6%                | 24.8%      | <0.0001  |
